# Supplementary material
Source: PubMed Central journal article supplement (PMC3129922)
Supplement: supp_00119.2011_suppdata.pdf [file supp_00119.2011_suppdata.pdf]

**Supplemental Table 1.** Diameter (mean  $\pm$  SD) and p-values for the ascending aorta at each pressure, age, and genotype.

Number of mice are shown in parentheses. Significant p-values are shown in bold.

| <b>P3</b>                           |                 | <b>Pressure (mmHg)</b> |                 |                 |                 |                 |                 |                 |                 |                 |                 |
|-------------------------------------|-----------------|------------------------|-----------------|-----------------|-----------------|-----------------|-----------------|-----------------|-----------------|-----------------|-----------------|
| <b>Diameter (<math>\mu</math>m)</b> | 0               | 9                      | 18              | 27              | 36              | 45              | 54              | 63              | 72              | 81              | 90              |
| WT (n=7)                            | 480<br>$\pm$ 18 | 503<br>$\pm$ 27        | 526<br>$\pm$ 26 | 568<br>$\pm$ 22 | 603<br>$\pm$ 29 | 633<br>$\pm$ 43 | 650<br>$\pm$ 45 | 667<br>$\pm$ 51 | 677<br>$\pm$ 50 | 684<br>$\pm$ 50 | 690<br>$\pm$ 51 |
| <i>Eln</i> <sup>+/-</sup> (n=5)     | 451<br>$\pm$ 25 | 484<br>$\pm$ 15        | 524<br>$\pm$ 26 | 562<br>$\pm$ 44 | 612<br>$\pm$ 59 | 635<br>$\pm$ 55 | 649<br>$\pm$ 55 | 659<br>$\pm$ 54 | 670<br>$\pm$ 51 | 674<br>$\pm$ 52 | 680<br>$\pm$ 53 |
| <b>p-value</b>                      | 0.070           | 0.156                  | 0.908           | 0.796           | 0.750           | 0.955           | 0.990           | 0.800           | 0.840           | 0.763           | 0.745           |

  

| <b>P7</b>                           |                 | <b>Pressure (mmHg)</b> |                 |                 |                 |                 |                 |                 |                 |                 |                 |
|-------------------------------------|-----------------|------------------------|-----------------|-----------------|-----------------|-----------------|-----------------|-----------------|-----------------|-----------------|-----------------|
| <b>Diameter (<math>\mu</math>m)</b> | 0               | 12                     | 24              | 36              | 48              | 60              | 72              | 84              | 96              | 108             | 120             |
| WT (n=9)                            | 611<br>$\pm$ 39 | 644<br>$\pm$ 34        | 687<br>$\pm$ 35 | 729<br>$\pm$ 34 | 774<br>$\pm$ 30 | 816<br>$\pm$ 35 | 843<br>$\pm$ 30 | 860<br>$\pm$ 30 | 871<br>$\pm$ 30 | 878<br>$\pm$ 31 | 883<br>$\pm$ 32 |
| <i>Eln</i> <sup>+/-</sup> (n=8)     | 569<br>$\pm$ 72 | 600<br>$\pm$ 74        | 651<br>$\pm$ 70 | 705<br>$\pm$ 80 | 727<br>$\pm$ 76 | 748<br>$\pm$ 71 | 761<br>$\pm$ 68 | 771<br>$\pm$ 64 | 779<br>$\pm$ 62 | 784<br>$\pm$ 62 | 788<br>$\pm$ 60 |
| <b>p-value</b>                      | 0.165           | 0.152                  | 0.215           | 0.450           | 0.134           | <b>0.034</b>    | <b>0.011</b>    | <b>0.005</b>    | <b>0.004</b>    | <b>0.003</b>    | <b>0.002</b>    |

  

| <b>P14</b>                          |                 | <b>Pressure (mmHg)</b> |                 |                 |                 |                 |                 |                  |                  |                  |                   |
|-------------------------------------|-----------------|------------------------|-----------------|-----------------|-----------------|-----------------|-----------------|------------------|------------------|------------------|-------------------|
| <b>Diameter (<math>\mu</math>m)</b> | 0               | 14                     | 28              | 42              | 56              | 70              | 84              | 98               | 112              | 126              | 140               |
| WT (n=10)                           | 788<br>$\pm$ 92 | 816<br>$\pm$ 78        | 853<br>$\pm$ 69 | 886<br>$\pm$ 63 | 925<br>$\pm$ 67 | 957<br>$\pm$ 73 | 992<br>$\pm$ 83 | 1027<br>$\pm$ 90 | 1049<br>$\pm$ 96 | 1069<br>$\pm$ 99 | 1080<br>$\pm$ 103 |
| <i>Eln</i> <sup>+/-</sup> (n=8)     | 701<br>$\pm$ 77 | 731<br>$\pm$ 63        | 777<br>$\pm$ 50 | 824<br>$\pm$ 53 | 876<br>$\pm$ 66 | 922<br>$\pm$ 73 | 961<br>$\pm$ 87 | 984<br>$\pm$ 88  | 1009<br>$\pm$ 94 | 1020<br>$\pm$ 96 | 1028<br>$\pm$ 96  |
| <b>p-value</b>                      | <b>0.044</b>    | <b>0.021</b>           | <b>0.016</b>    | <b>0.040</b>    | 0.138           | 0.335           | 0.453           | 0.328            | 0.389            | 0.309            | 0.284             |

  

| <b>P21</b>                          |              | <b>Pressure (mmHg)</b> |              |               |               |               |               |               |               |  |  |
|-------------------------------------|--------------|------------------------|--------------|---------------|---------------|---------------|---------------|---------------|---------------|--|--|
| <b>Diameter (<math>\mu</math>m)</b> | 0            | 20                     | 40           | 60            | 80            | 100           | 120           | 140           | 160           |  |  |
| WT (n=7)                            | 871 $\pm$ 62 | 916 $\pm$ 50           | 970 $\pm$ 51 | 1030 $\pm$ 54 | 1092 $\pm$ 61 | 1158 $\pm$ 68 | 1223 $\pm$ 79 | 1256 $\pm$ 80 | 1284 $\pm$ 76 |  |  |
| <i>Eln</i> <sup>+/-</sup> (n=10)    | 758 $\pm$ 47 | 795 $\pm$ 59           | 858 $\pm$ 68 | 932 $\pm$ 82  | 1013 $\pm$ 99 | 1084 $\pm$ 98 | 1133 $\pm$ 87 | 1162 $\pm$ 75 | 1178 $\pm$ 68 |  |  |
| <b>p-value</b>                      | <b>0.002</b> | <b>&lt; 0.001</b>      | <b>0.002</b> | <b>0.009</b>  | 0.060         | 0.083         | <b>0.046</b>  | <b>0.030</b>  | <b>0.012</b>  |  |  |

  

| <b>P30</b>                          |                   | <b>Pressure (mmHg)</b> |                   |               |               |                |                |                |  |
|-------------------------------------|-------------------|------------------------|-------------------|---------------|---------------|----------------|----------------|----------------|--|
| <b>Diameter (<math>\mu</math>m)</b> | 0                 | 25                     | 50                | 75            | 100           | 125            | 150            | 175            |  |
| WT (n=8)                            | 1022 $\pm$ 54     | 1070 $\pm$ 47          | 1128 $\pm$ 40     | 1211 $\pm$ 60 | 1305 $\pm$ 78 | 1401 $\pm$ 102 | 1470 $\pm$ 114 | 1510 $\pm$ 117 |  |
| <i>Eln</i> <sup>+/-</sup> (n=6)     | 829 $\pm$ 77      | 891 $\pm$ 68           | 979 $\pm$ 71      | 1096 $\pm$ 85 | 1218 $\pm$ 89 | 1293 $\pm$ 94  | 1326 $\pm$ 97  | 1346 $\pm$ 98  |  |
| <b>p-value</b>                      | <b>&lt; 0.001</b> | <b>&lt; 0.001</b>      | <b>&lt; 0.001</b> | <b>0.012</b>  | 0.079         | 0.070          | <b>0.033</b>   | <b>0.012</b>   |  |

  

| <b>P60</b>                          |                | <b>Pressure (mmHg)</b> |               |               |               |               |               |               |
|-------------------------------------|----------------|------------------------|---------------|---------------|---------------|---------------|---------------|---------------|
| <b>Diameter (<math>\mu</math>m)</b> | 0              | 25                     | 50            | 75            | 100           | 125           | 150           | 175           |
| WT (n=8)                            | 1030 $\pm$ 107 | 1113 $\pm$ 73          | 1200 $\pm$ 68 | 1323 $\pm$ 81 | 1456 $\pm$ 80 | 1569 $\pm$ 86 | 1637 $\pm$ 88 | 1678 $\pm$ 91 |
| <i>Eln</i> <sup>+/-</sup> (n=8)     | 922 $\pm$ 37   | 990 $\pm$ 26           | 1116 $\pm$ 60 | 1275 $\pm$ 74 | 1408 $\pm$ 76 | 1470 $\pm$ 69 | 1500 $\pm$ 71 | 1517 $\pm$ 70 |
| <b>p-value</b>                      | <b>0.025</b>   | <b>0.002</b>           | <b>0.020</b>  | 0.239         | 0.237         | <b>0.024</b>  | <b>0.004</b>  | <b>0.002</b>  |

**Supplemental Table 2.** Diameter (mean  $\pm$  SD) and p-values for the left carotid artery at each pressure, age, and genotype. Number of mice are shown in parentheses. Significant p-values are shown in bold.

| <b>P7</b>                           |                 | <b>Pressure (mmHg)</b> |                 |                 |                 |                 |                 |                 |                 |                 |                 |
|-------------------------------------|-----------------|------------------------|-----------------|-----------------|-----------------|-----------------|-----------------|-----------------|-----------------|-----------------|-----------------|
| <b>Diameter (<math>\mu</math>m)</b> | 0               | 12                     | 24              | 36              | 48              | 60              | 72              | 84              | 96              | 108             | 120             |
| WT (n=10)                           | 277<br>$\pm$ 27 | 300<br>$\pm$ 30        | 320<br>$\pm$ 29 | 337<br>$\pm$ 29 | 354<br>$\pm$ 21 | 363<br>$\pm$ 22 | 369<br>$\pm$ 20 | 374<br>$\pm$ 20 | 376<br>$\pm$ 21 | 378<br>$\pm$ 20 | 381<br>$\pm$ 20 |
| <i>Eln</i> <sup>+/-</sup> (n=8)     | 256<br>$\pm$ 30 | 280<br>$\pm$ 23        | 306<br>$\pm$ 27 | 324<br>$\pm$ 31 | 335<br>$\pm$ 26 | 341<br>$\pm$ 25 | 346<br>$\pm$ 27 | 348<br>$\pm$ 27 | 351<br>$\pm$ 28 | 353<br>$\pm$ 28 | 355<br>$\pm$ 28 |
| <b>p-value</b>                      | 0.138           | 0.135                  | 0.316           | 0.394           | 0.134           | 0.069           | 0.059           | <b>0.043</b>    | 0.059           | 0.055           | <b>0.047</b>    |

  

| <b>P14</b>                          |                 | <b>Pressure (mmHg)</b> |                 |                 |                 |                 |                 |                 |                 |                 |                 |
|-------------------------------------|-----------------|------------------------|-----------------|-----------------|-----------------|-----------------|-----------------|-----------------|-----------------|-----------------|-----------------|
| <b>Diameter (<math>\mu</math>m)</b> | 0               | 14                     | 28              | 42              | 56              | 70              | 84              | 98              | 112             | 126             | 140             |
| WT (n=9)                            | 334<br>$\pm$ 18 | 347<br>$\pm$ 22        | 370<br>$\pm$ 29 | 389<br>$\pm$ 34 | 413<br>$\pm$ 39 | 432<br>$\pm$ 39 | 447<br>$\pm$ 37 | 455<br>$\pm$ 35 | 460<br>$\pm$ 35 | 462<br>$\pm$ 35 | 464<br>$\pm$ 35 |
| <i>Eln</i> <sup>+/-</sup> (n=6)     | 319<br>$\pm$ 25 | 334<br>$\pm$ 25        | 352<br>$\pm$ 21 | 383<br>$\pm$ 22 | 405<br>$\pm$ 21 | 422<br>$\pm$ 22 | 429<br>$\pm$ 23 | 435<br>$\pm$ 22 | 437<br>$\pm$ 24 | 439<br>$\pm$ 23 | 442<br>$\pm$ 23 |
| <b>p-value</b>                      | 0.251           | 0.344                  | 0.191           | 0.654           | 0.648           | 0.520           | 0.266           | 0.202           | 0.168           | 0.149           | 0.167           |

  

| <b>P21</b>                          |              | <b>Pressure (mmHg)</b> |              |              |              |                  |                  |                  |                  |  |
|-------------------------------------|--------------|------------------------|--------------|--------------|--------------|------------------|------------------|------------------|------------------|--|
| <b>Diameter (<math>\mu</math>m)</b> | 0            | 20                     | 40           | 60           | 80           | 100              | 120              | 140              | 160              |  |
| WT (n=9)                            | 335 $\pm$ 24 | 353 $\pm$ 21           | 388 $\pm$ 17 | 438 $\pm$ 19 | 516 $\pm$ 36 | 579 $\pm$ 31     | 599 $\pm$ 26     | 606 $\pm$ 25     | 610 $\pm$ 26     |  |
| <i>Eln</i> <sup>+/-</sup> (n=9)     | 306 $\pm$ 12 | 327 $\pm$ 12           | 370 $\pm$ 14 | 421 $\pm$ 22 | 469 $\pm$ 22 | 496 $\pm$ 9      | 506 $\pm$ 11     | 510 $\pm$ 13     | 513 $\pm$ 12     |  |
| <b>p-value</b>                      | <b>0.006</b> | <b>0.005</b>           | <b>0.030</b> | 0.088        | <b>0.005</b> | <b>&lt; .001</b> | <b>&lt; .001</b> | <b>&lt; .001</b> | <b>&lt; .001</b> |  |

  

| <b>P30</b>                          |              | <b>Pressure (mmHg)</b> |              |              |              |              |              |              |
|-------------------------------------|--------------|------------------------|--------------|--------------|--------------|--------------|--------------|--------------|
| <b>Diameter (<math>\mu</math>m)</b> | 0            | 25                     | 50           | 75           | 100          | 125          | 150          | 175          |
| WT (n=8)                            | 363 $\pm$ 28 | 392 $\pm$ 32           | 434 $\pm$ 34 | 501 $\pm$ 41 | 580 $\pm$ 56 | 614 $\pm$ 58 | 628 $\pm$ 57 | 635 $\pm$ 56 |
| <i>Eln</i> <sup>+/-</sup> (n=8)     | 332 $\pm$ 15 | 356 $\pm$ 13           | 402 $\pm$ 12 | 479 $\pm$ 22 | 545 $\pm$ 20 | 565 $\pm$ 25 | 572 $\pm$ 25 | 578 $\pm$ 27 |
| <b>p-value</b>                      | <b>0.018</b> | <b>0.016</b>           | <b>0.034</b> | 0.214        | 0.134        | 0.055        | <b>0.031</b> | <b>0.026</b> |

  

| <b>P60</b>                          |              | <b>Pressure (mmHg)</b> |              |              |              |              |              |              |
|-------------------------------------|--------------|------------------------|--------------|--------------|--------------|--------------|--------------|--------------|
| <b>Diameter (<math>\mu</math>m)</b> | 0            | 25                     | 50           | 75           | 100          | 125          | 150          | 175          |
| WT (n=8)                            | 383 $\pm$ 30 | 420 $\pm$ 22           | 466 $\pm$ 24 | 533 $\pm$ 40 | 592 $\pm$ 39 | 621 $\pm$ 35 | 636 $\pm$ 37 | 645 $\pm$ 38 |
| <i>Eln</i> <sup>+/-</sup> (n=8)     | 346 $\pm$ 15 | 386 $\pm$ 12           | 441 $\pm$ 15 | 510 $\pm$ 20 | 559 $\pm$ 22 | 579 $\pm$ 26 | 590 $\pm$ 32 | 596 $\pm$ 32 |
| <b>p-value</b>                      | <b>0.011</b> | <b>0.003</b>           | <b>0.031</b> | 0.174        | 0.061        | <b>0.019</b> | <b>0.020</b> | <b>0.015</b> |

**Supplemental Table 3.** Compliance (mean  $\pm$  SD) and p-values for the ascending aorta at each pressure, age, and genotype. Number of mice are shown in parentheses. Significant p-values are shown in bold.

| <b>P3</b>                                                |   | <b>Pressure (mmHg)</b> |                    |                    |                    |                    |                    |                    |                    |                    |                    |
|----------------------------------------------------------|---|------------------------|--------------------|--------------------|--------------------|--------------------|--------------------|--------------------|--------------------|--------------------|--------------------|
| <b>Compliance (<math>\mu\text{m}/\text{mmHg}</math>)</b> | 0 | 9                      | 18                 | 27                 | 36                 | 45                 | 54                 | 63                 | 72                 | 81                 | 90                 |
| WT (n=7)                                                 | 0 | 2.96<br>$\pm$ 0.80     | 3.96<br>$\pm$ 0.93 | 4.09<br>$\pm$ 1.04 | 3.61<br>$\pm$ 0.93 | 2.84<br>$\pm$ 0.72 | 2.05<br>$\pm$ 0.53 | 1.38<br>$\pm$ 0.42 | 0.88<br>$\pm$ 0.35 | 0.76<br>$\pm$ 0.22 | 0.75<br>$\pm$ 0.29 |
| <i>Eln</i> <sup>+/-</sup> (n=5)                          | 0 | 4.32<br>$\pm$ 2.87     | 4.90<br>$\pm$ 2.49 | 4.52<br>$\pm$ 2.04 | 3.61<br>$\pm$ 1.32 | 2.57<br>$\pm$ 0.73 | 1.67<br>$\pm$ 0.52 | 1.01<br>$\pm$ 0.42 | 0.58<br>$\pm$ 0.30 | 0.53<br>$\pm$ 0.26 | 0.64<br>$\pm$ 0.46 |
| <b>p-value</b>                                           |   | 0.352                  | 0.460              | 0.698              | 0.100              | 0.534              | 0.248              | 0.170              | 0.142              | 0.152              | 0.678              |
| <b>P7</b>                                                |   | <b>Pressure (mmHg)</b> |                    |                    |                    |                    |                    |                    |                    |                    |                    |
| <b>Compliance (<math>\mu\text{m}/\text{mmHg}</math>)</b> | 0 | 12                     | 24                 | 36                 | 48                 | 60                 | 72                 | 84                 | 96                 | 108                | 120                |
| WT (n=9)                                                 | 0 | 3.36<br>$\pm$ 1.36     | 4.12<br>$\pm$ 0.97 | 4.03<br>$\pm$ 0.79 | 3.41<br>$\pm$ 0.55 | 2.59<br>$\pm$ 0.38 | 1.82<br>$\pm$ 0.39 | 1.22<br>$\pm$ 0.43 | 0.80<br>$\pm$ 0.44 | 0.53<br>$\pm$ 0.42 | 0.36<br>$\pm$ 0.38 |
| <i>Eln</i> <sup>+/-</sup> (n=8)                          | 0 | 3.93<br>$\pm$ 1.51     | 4.03<br>$\pm$ 1.37 | 3.22<br>$\pm$ 0.88 | 2.25<br>$\pm$ 0.58 | 1.45<br>$\pm$ 0.66 | 0.91<br>$\pm$ 0.68 | 0.56<br>$\pm$ 0.59 | 0.35<br>$\pm$ 0.45 | 0.21<br>$\pm$ 0.31 | 0.12<br>$\pm$ 0.20 |
| <b>p-value</b>                                           |   | 0.428                  | 0.884              | 0.068              | <b>&lt; 0.001</b>  | <b>0.001</b>       | <b>0.007</b>       | <b>0.023</b>       | 0.054              | 0.095              | 0.131              |
| <b>P14</b>                                               |   | <b>Pressure (mmHg)</b> |                    |                    |                    |                    |                    |                    |                    |                    |                    |
| <b>Compliance (<math>\mu\text{m}/\text{mmHg}</math>)</b> | 0 | 14                     | 28                 | 42                 | 56                 | 70                 | 84                 | 98                 | 112                | 126                | 140                |
| WT (n=10)                                                | 0 | 2.34<br>$\pm$ 1.55     | 2.69<br>$\pm$ 1.06 | 2.81<br>$\pm$ 0.60 | 2.77<br>$\pm$ 0.57 | 2.61<br>$\pm$ 0.72 | 2.33<br>$\pm$ 0.77 | 2.01<br>$\pm$ 0.76 | 1.67<br>$\pm$ 0.76 | 1.37<br>$\pm$ 0.77 | 1.13<br>$\pm$ 0.76 |
| <i>Eln</i> <sup>+/-</sup> (n=8)                          | 0 | 2.81<br>$\pm$ 1.12     | 3.54<br>$\pm$ 0.91 | 3.69<br>$\pm$ 1.18 | 3.37<br>$\pm$ 1.27 | 2.76<br>$\pm$ 1.06 | 2.05<br>$\pm$ 0.73 | 1.42<br>$\pm$ 0.48 | 0.94<br>$\pm$ 0.36 | 0.60<br>$\pm$ 0.32 | 0.39<br>$\pm$ 0.31 |
| <b>p-value</b>                                           |   | 0.472                  | 0.086              | 0.084              | 0.249              | 0.740              | 0.442              | 0.066              | <b>0.018</b>       | <b>0.013</b>       | <b>0.016</b>       |
| <b>P21</b>                                               |   | <b>Pressure (mmHg)</b> |                    |                    |                    |                    |                    |                    |                    |                    |                    |
| <b>Compliance (<math>\mu\text{m}/\text{mmHg}</math>)</b> | 0 | 20                     | 40                 | 60                 | 80                 | 100                | 120                | 140                | 160                |                    |                    |
| WT (n=7)                                                 | 0 | 2.46 $\pm$ 0.54        | 3.13 $\pm$ 0.26    | 3.35 $\pm$ 0.59    | 3.23 $\pm$ 0.78    | 2.86 $\pm$ 0.66    | 2.37 $\pm$ 0.40    | 1.87 $\pm$ 0.24    | 1.44 $\pm$ 0.31    |                    |                    |
| <i>Eln</i> <sup>+/-</sup> (n=7)                          | 0 | 2.19 $\pm$ 1.03        | 3.44 $\pm$ 1.07    | 3.92 $\pm$ 1.19    | 3.66 $\pm$ 1.20    | 2.94 $\pm$ 1.04    | 2.13 $\pm$ 1.01    | 1.46 $\pm$ 0.99    | 0.98 $\pm$ 0.83    |                    |                    |
| <b>p-value</b>                                           |   | 0.552                  | 0.476              | 0.290              | 0.450              | 0.877              | 0.569              | 0.323              | 0.212              |                    |                    |
| <b>P30</b>                                               |   | <b>Pressure (mmHg)</b> |                    |                    |                    |                    |                    |                    |                    |                    |                    |
| <b>Compliance (<math>\mu\text{m}/\text{mmHg}</math>)</b> | 0 | 25                     | 50                 | 75                 | 100                | 125                | 150                | 175                |                    |                    |                    |
| WT (n=6)                                                 | 0 | 1.96 $\pm$ 0.50        | 3.22 $\pm$ 0.43    | 3.85 $\pm$ 0.91    | 3.75 $\pm$ 1.15    | 3.10 $\pm$ 1.04    | 2.28 $\pm$ 0.93    | 1.58 $\pm$ 1.05    |                    |                    |                    |
| <i>Eln</i> <sup>+/-</sup> (n=8)                          | 0 | 3.07 $\pm$ 1.21        | 4.80 $\pm$ 1.40    | 4.87 $\pm$ 1.28    | 3.73 $\pm$ 1.01    | 2.24 $\pm$ 0.59    | 1.11 $\pm$ 0.37    | 0.49 $\pm$ 0.37    |                    |                    |                    |
| <b>p-value</b>                                           |   | <b>0.041</b>           | <b>0.016</b>       | 0.108              | 0.972              | 0.108              | <b>0.026</b>       | 0.052              |                    |                    |                    |
| <b>P60</b>                                               |   | <b>Pressure (mmHg)</b> |                    |                    |                    |                    |                    |                    |                    |                    |                    |
| <b>Compliance (<math>\mu\text{m}/\text{mmHg}</math>)</b> | 0 | 25                     | 50                 | 75                 | 100                | 125                | 150                | 175                |                    |                    |                    |
| WT (n=8)                                                 | 0 | 3.44 $\pm$ 1.86        | 4.91 $\pm$ 0.81    | 5.25 $\pm$ 0.52    | 4.66 $\pm$ 0.73    | 3.57 $\pm$ 0.75    | 2.40 $\pm$ 0.67    | 1.45 $\pm$ 0.57    |                    |                    |                    |
| <i>Eln</i> <sup>+/-</sup> (n=8)                          | 0 | 4.23 $\pm$ 1.25        | 6.37 $\pm$ 0.96    | 5.88 $\pm$ 0.85    | 3.85 $\pm$ 0.70    | 1.90 $\pm$ 0.54    | 0.74 $\pm$ 0.34    | 0.24 $\pm$ 0.17    |                    |                    |                    |
| <b>p-value</b>                                           |   | 0.337                  | <b>0.006</b>       | 0.101              | <b>0.041</b>       | <b>&lt; 0.001</b>  | <b>&lt; 0.001</b>  | <b>&lt; 0.001</b>  |                    |                    |                    |

**Supplemental Table 4.** Compliance (mean  $\pm$  SD) and p-values for the left carotid artery at each pressure, age, and genotype. Number of mice are shown in parentheses. Significant p-values are shown in bold.

| <b>P7</b>                                                |   | <b>Pressure (mmHg)</b> |                    |                    |                    |                    |                    |                    |                    |                    |                    |
|----------------------------------------------------------|---|------------------------|--------------------|--------------------|--------------------|--------------------|--------------------|--------------------|--------------------|--------------------|--------------------|
| <b>Compliance (<math>\mu\text{m}/\text{mmHg}</math>)</b> | 0 | 12                     | 24                 | 36                 | 48                 | 60                 | 72                 | 84                 | 96                 | 108                | 120                |
| WT (n=10)                                                | 0 | 1.71<br>$\pm$ 0.82     | 1.58<br>$\pm$ 0.44 | 1.30<br>$\pm$ 0.45 | 1.00<br>$\pm$ 0.48 | 0.73<br>$\pm$ 0.41 | 0.50<br>$\pm$ 0.30 | 0.32<br>$\pm$ 0.20 | 0.20<br>$\pm$ 0.13 | 0.12<br>$\pm$ 0.09 | 0.07<br>$\pm$ 0.07 |
| <i>Eln</i> <sup>+/-</sup> (n=8)                          | 0 | 2.10<br>$\pm$ 1.18     | 1.83<br>$\pm$ 0.52 | 1.27<br>$\pm$ 0.45 | 0.77<br>$\pm$ 0.47 | 0.43<br>$\pm$ 0.39 | 0.24<br>$\pm$ 0.30 | 0.16<br>$\pm$ 0.22 | 0.09<br>$\pm$ 0.13 | 0.05<br>$\pm$ 0.09 | 0.03<br>$\pm$ 0.06 |
| <b>p-value</b>                                           |   | 0.452                  | 0.300              | 0.883              | 0.316              | 0.132              | 0.084              | 0.146              | 0.105              | 0.146              | 0.207              |

  

| <b>P14</b>                                               |   | <b>Pressure (mmHg)</b> |                    |                    |                    |                    |                    |                    |                    |                    |                    |
|----------------------------------------------------------|---|------------------------|--------------------|--------------------|--------------------|--------------------|--------------------|--------------------|--------------------|--------------------|--------------------|
| <b>Compliance (<math>\mu\text{m}/\text{mmHg}</math>)</b> | 0 | 14                     | 28                 | 42                 | 56                 | 70                 | 84                 | 98                 | 112                | 126                | 140                |
| WT (n=9)                                                 | 0 | 1.14<br>$\pm$ 0.93     | 1.64<br>$\pm$ 0.85 | 1.74<br>$\pm$ 0.45 | 1.58<br>$\pm$ 0.34 | 1.28<br>$\pm$ 0.50 | 0.94<br>$\pm$ 0.55 | 0.62<br>$\pm$ 0.49 | 0.37<br>$\pm$ 0.35 | 0.19<br>$\pm$ 0.20 | 0.09<br>$\pm$ 0.10 |
| <i>Eln</i> <sup>+/-</sup> (n=6)                          | 0 | 1.25<br>$\pm$ 0.29     | 2.03<br>$\pm$ 0.60 | 1.99<br>$\pm$ 0.34 | 1.43<br>$\pm$ 0.16 | 0.86<br>$\pm$ 0.30 | 0.46<br>$\pm$ 0.23 | 0.22<br>$\pm$ 0.13 | 0.09<br>$\pm$ 0.06 | 0.03<br>$\pm$ 0.03 | 0.01<br>$\pm$ 0.01 |
| <b>p-value</b>                                           |   | 0.751                  | 0.314              | 0.246              | 0.305              | 0.063              | <b>0.039</b>       | <b>0.041</b>       | <b>0.046</b>       | <b>0.045</b>       | <b>0.039</b>       |

  

| <b>P21</b>                                               |   | <b>Pressure (mmHg)</b> |                 |                 |                   |                   |                 |                 |                  |  |
|----------------------------------------------------------|---|------------------------|-----------------|-----------------|-------------------|-------------------|-----------------|-----------------|------------------|--|
| <b>Compliance (<math>\mu\text{m}/\text{mmHg}</math>)</b> | 0 | 20                     | 40              | 60              | 80                | 100               | 120             | 140             | 160              |  |
| WT (n=9)                                                 | 0 | 0.79 $\pm$ 0.25        | 2.44 $\pm$ 0.49 | 3.73 $\pm$ 0.73 | 3.44 $\pm$ 0.50   | 1.97 $\pm$ 0.44   | 0.75 $\pm$ 0.39 | 0.21 $\pm$ 0.20 | 0.050 $\pm$ 0.08 |  |
| <i>Eln</i> <sup>+/-</sup> (n=7)                          | 0 | 1.44 $\pm$ 0.49        | 2.62 $\pm$ 0.57 | 2.72 $\pm$ 0.33 | 1.94 $\pm$ 0.34   | 1.01 $\pm$ 0.44   | 0.41 $\pm$ 0.30 | 0.14 $\pm$ 0.13 | 0.04 $\pm$ 0.04  |  |
| <b>p-value</b>                                           |   | <b>0.012</b>           | 0.535           | <b>0.003</b>    | <b>&lt; 0.001</b> | <b>&lt; 0.001</b> | 0.072           | 0.384           | 0.680            |  |

  

| <b>P30</b>                                               |   | <b>Pressure (mmHg)</b> |                 |                 |                 |                 |                 |                 |
|----------------------------------------------------------|---|------------------------|-----------------|-----------------|-----------------|-----------------|-----------------|-----------------|
| <b>Compliance (<math>\mu\text{m}/\text{mmHg}</math>)</b> | 0 | 25                     | 50              | 75              | 100             | 125             | 150             | 175             |
| WT (n=8)                                                 | 0 | 1.24 $\pm$ 0.18        | 2.67 $\pm$ 0.48 | 3.03 $\pm$ 0.70 | 2.16 $\pm$ 0.53 | 1.03 $\pm$ 0.35 | 0.36 $\pm$ 0.23 | 0.11 $\pm$ 0.12 |
| <i>Eln</i> <sup>+/-</sup> (n=8)                          | 0 | 1.29 $\pm$ 0.34        | 2.91 $\pm$ 0.34 | 3.01 $\pm$ 0.42 | 1.68 $\pm$ 0.47 | 0.54 $\pm$ 0.30 | 0.11 $\pm$ 0.08 | 0.01 $\pm$ 0.01 |
| <b>p-value</b>                                           |   | 0.738                  | 0.270           | 0.950           | 0.072           | <b>0.010</b>    | <b>0.020</b>    | 0.066           |

  

| <b>P60</b>                                               |   | <b>Pressure (mmHg)</b> |                 |                 |                 |                 |                 |                 |
|----------------------------------------------------------|---|------------------------|-----------------|-----------------|-----------------|-----------------|-----------------|-----------------|
| <b>Compliance (<math>\mu\text{m}/\text{mmHg}</math>)</b> | 0 | 25                     | 50              | 75              | 100             | 125             | 150             | 175             |
| WT (n=8)                                                 | 0 | 1.78 $\pm$ .072        | 2.63 $\pm$ 0.60 | 2.47 $\pm$ 0.50 | 1.71 $\pm$ 0.56 | 0.94 $\pm$ 0.54 | 0.44 $\pm$ 0.35 | 0.18 $\pm$ 0.16 |
| <i>Eln</i> <sup>+/-</sup> (n=8)                          | 0 | 2.19 $\pm$ 0.30        | 2.79 $\pm$ 0.34 | 2.25 $\pm$ 0.28 | 1.36 $\pm$ 0.33 | 0.67 $\pm$ 0.31 | 0.28 $\pm$ 0.20 | 0.11 $\pm$ 0.10 |
| <b>p-value</b>                                           |   | 0.171                  | 0.522           | 0.289           | 0.149           | 0.235           | 0.298           | 0.331           |

**Supplemental Figure 1.** The unloaded outer diameter of the left carotid artery is significantly smaller in *Eln*<sup>+/-</sup> mice by P21 (A). The thickness is not significantly different at any age (B). N = 6 – 11/group.

**Supplemental Figure 2.** Carotid pressure-outer diameter curves for WT (A), *Eln*<sup>+/-</sup> (B), and representative ages for both genotypes (C). Diameter differences between the genotypes are significant for at least five pressure steps at P21 – 60 (Supplemental Table 2). N = 6 – 10/group.

**Supplemental Figure 3.** Carotid normalized pressure-outer diameter curves for WT (A), *Eln*<sup>+/-</sup> (B), and representative ages for both genotypes (C). WT and *Eln*<sup>+/-</sup> carotid have similar diameters at the systolic pressure (SP) for each age and genotype except for P21 (D). Error bars same as Supp. Fig. 2, but removed for clarity. N = 6 – 10/group.

**Supplemental Figure 4.** Carotid normalized pressure-compliance curves for WT (A), *Eln*<sup>+/-</sup> (B), and representative ages for both genotypes (C). At the systolic pressure (SP) for each age and genotype, the compliance of *Eln*<sup>+/-</sup> carotid is significantly lower than WT for P14 – 60 (D). N = 6 – 10/group.

**Supplemental Figure 5.** Carotid circumferential stretch ratio-stress curves for WT (A), *Eln*<sup>+/-</sup> (B), and representative ages for both genotypes (C). The curves segregate into two groups by age, but are similar between genotypes for most ages. N = 6 – 10/group.

**Supplemental Figure 6.** Carotid circumferential stretch ratio (A), circumferential stress (B), Hudetz elastic modulus (HM) (C) and pulse wave velocity (PWV) (D) at the systolic pressure (SP) for each age and genotype. There are significant differences between genotypes for the stretch ratio and stress by P60 and the HM and PWV by P14. N = 6 – 10/group.

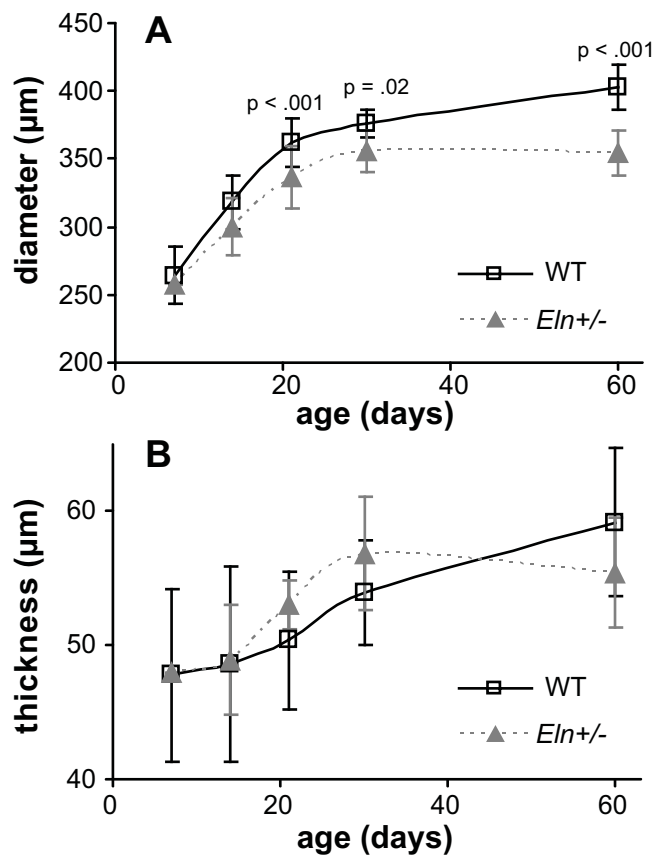

Supplemental Figure 1

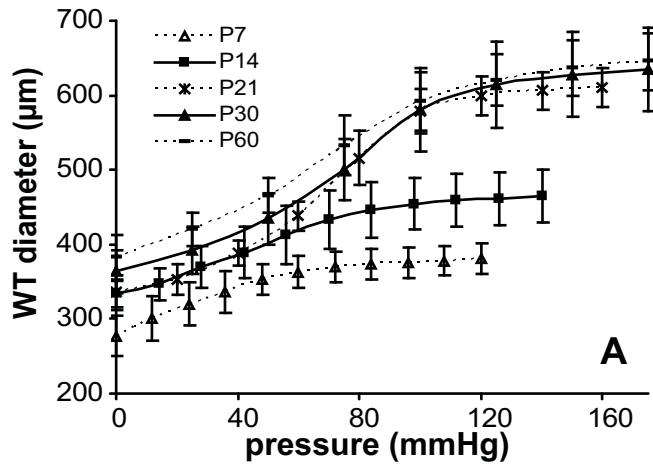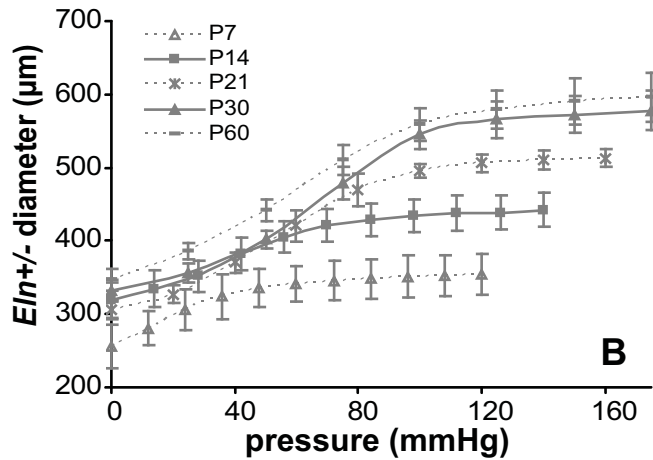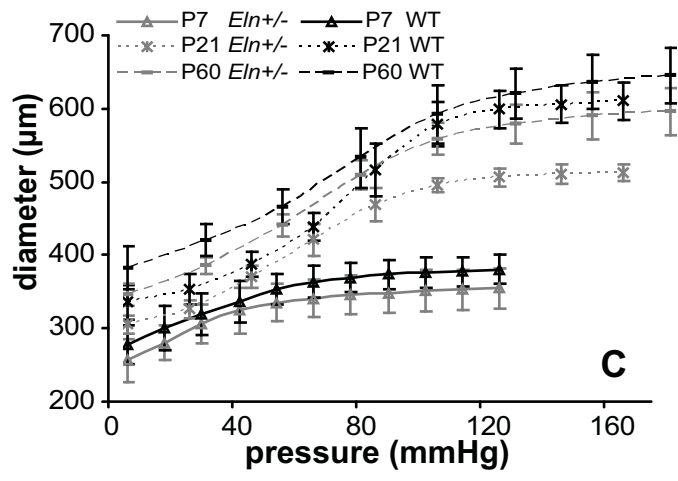

Supplemental Figure 2



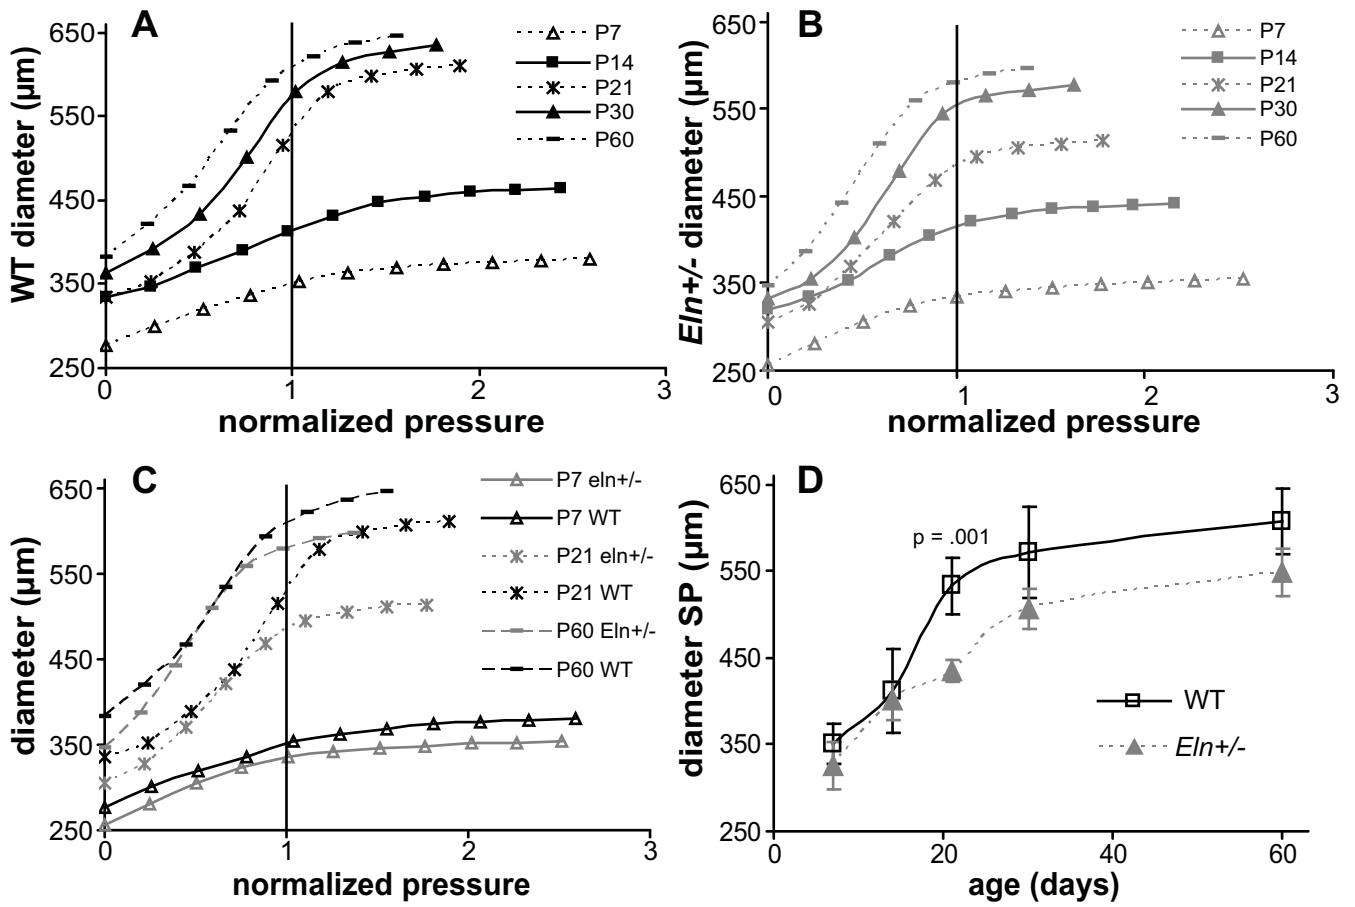

Supplemental Figure 3

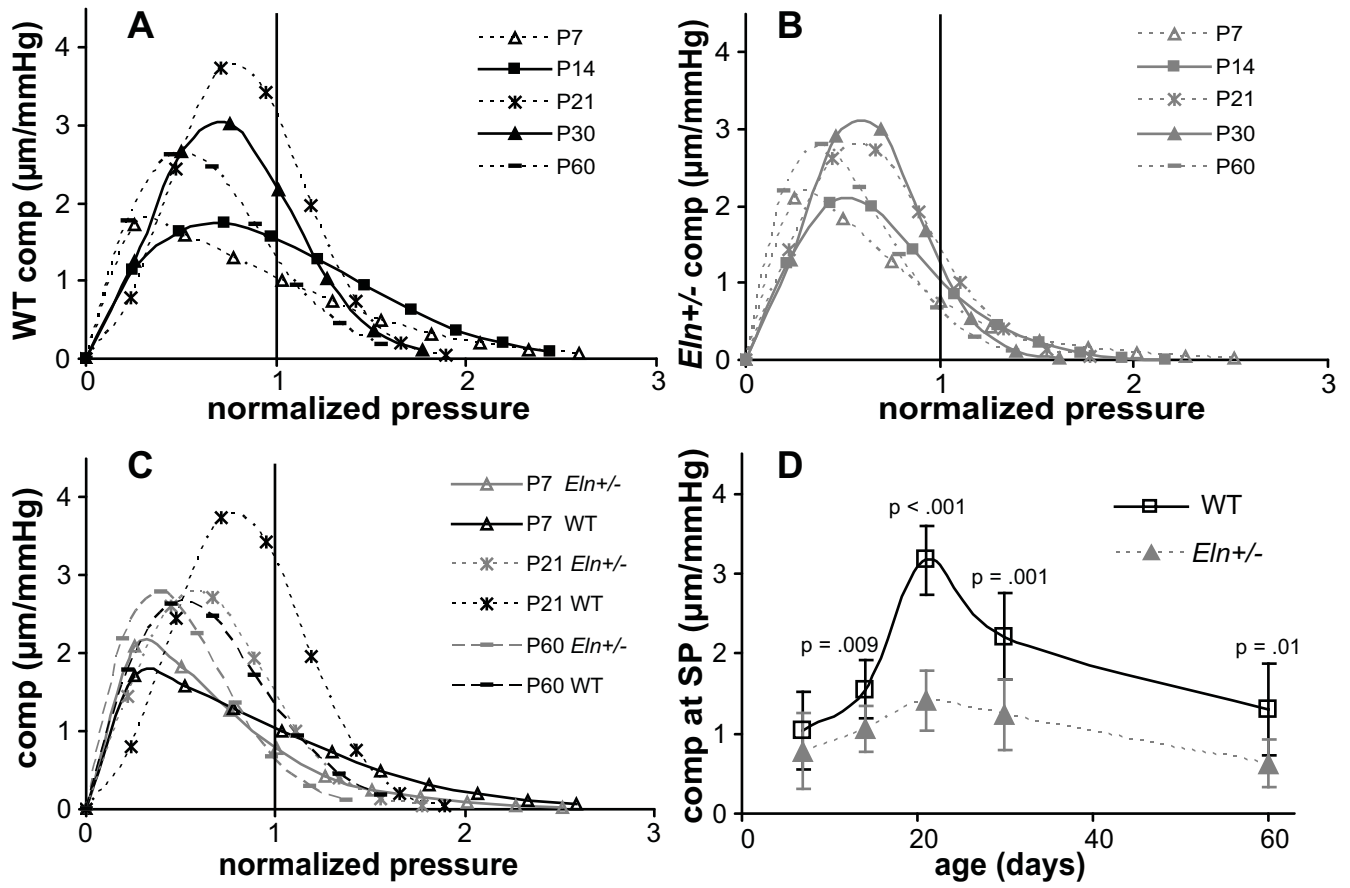

Supplemental Figure 4

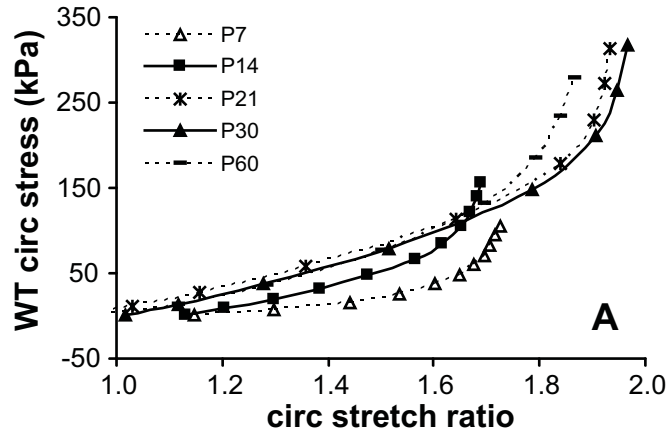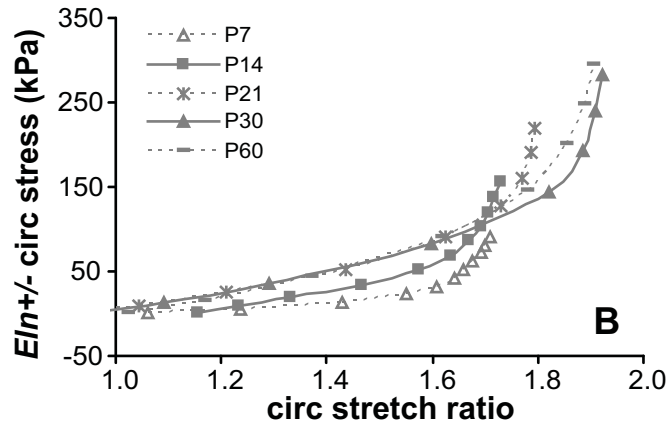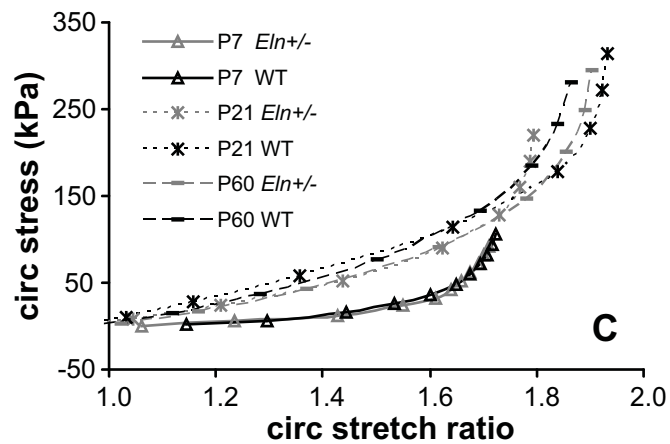

**Supplemental Figure 5**

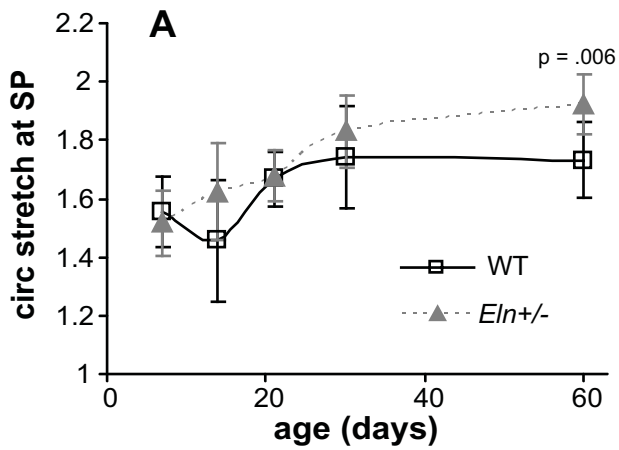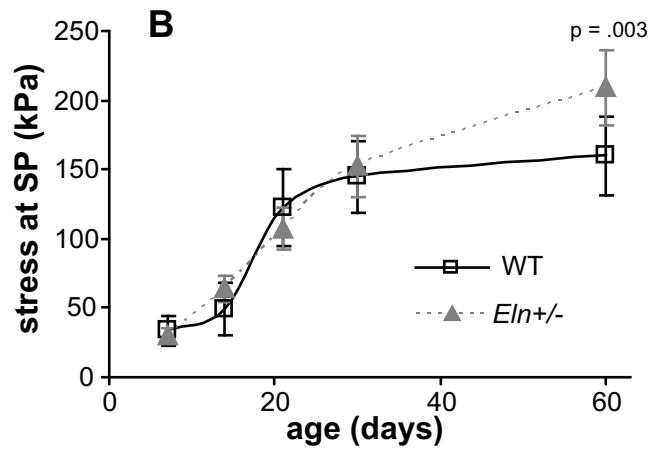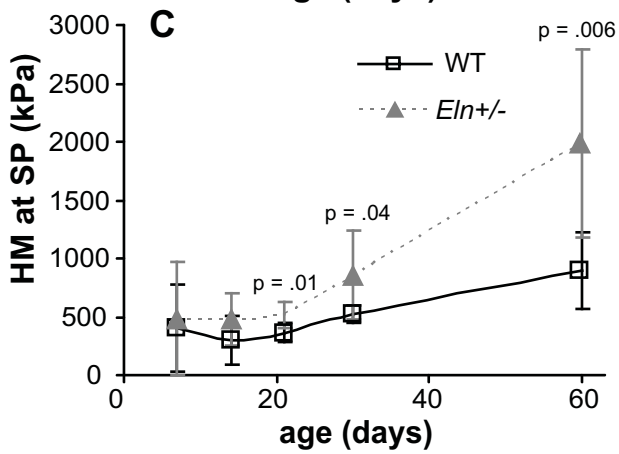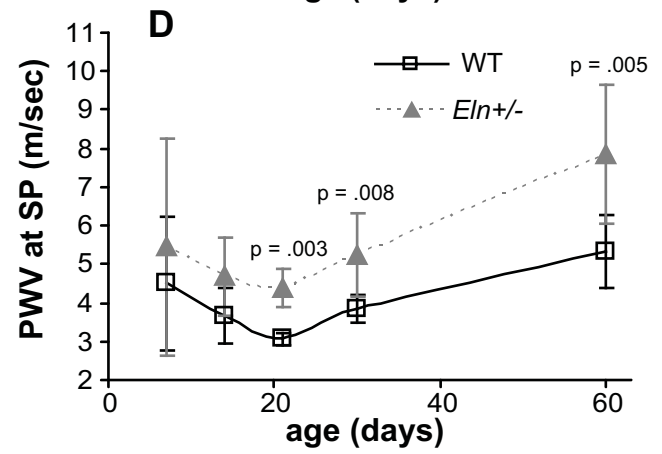

Supplemental Figure 6
